# Supplementary material
Source: PubMed Central journal article supplement (PMC7536749)
Supplement: CJN.03210320SupplementaryData.pdf [file CJN.03210320SupplementaryData.pdf]

## Supplemental Material

Supplemental Table 1. Immunofluorescence report.

Supplemental Table 2. Final diagnoses of the kidney biopsies.

Supplemental Table 3. Numeric distribution of the immunofluorescence features.

Supplemental Table 4. Percent distribution of the immunofluorescence features.

Supplemental Table 5. Ground truth agreement between pathologists and Convolutional Neural Networks.

Supplemental Table 6. Inter-agreement Cohen's K of each feature.

Supplemental Table 7. Comparison of the report of a case of Lupus Nephritis (Supplemental Figure 4) between Ground Truth and Convolutional Neural Networks (CNN).

Supplemental Table 8. Ground truth agreement between pathologists and Convolutional Neural Networks.

Supplemental Figure 1. Classification of the '*Appearance*' of the deposits of the Immunofluorescence specimen.

Supplemental Figure 2. Classification of the '*Distribution*' of the deposits of the Immunofluorescence specimen.

Supplemental Figure 3. Classification of the '*Location*' of the deposits of the Immunofluorescence specimen.

Supplemental Figure 4. IgG direct Immunofluorescence of a Lupus Nephritis case.

Supplemental Figure 5. IgG direct Immunofluorescence of a Light Chain deposition disease.

**Supplemental Table 1. Immunofluorescence report.**

|           |              |                                                   | IgG | IgA | IgM | C1q | C3 | F | Kappa | Lambda |
|-----------|--------------|---------------------------------------------------|-----|-----|-----|-----|----|---|-------|--------|
| GLOMERULI | appearance   | linear                                            |     |     |     |     |    |   |       |        |
|           |              | pseudolinear                                      |     |     |     |     |    |   |       |        |
|           |              | coarse granular                                   |     |     |     |     |    |   |       |        |
|           |              | fine granular                                     |     |     |     |     |    |   |       |        |
|           | distribution | diffuse/segmental                                 |     |     |     |     |    |   |       |        |
|           |              | diffuse/global                                    |     |     |     |     |    |   |       |        |
|           |              | focal/segmental                                   |     |     |     |     |    |   |       |        |
|           |              | focal/global                                      |     |     |     |     |    |   |       |        |
|           | location     | mesangial                                         |     |     |     |     |    |   |       |        |
|           |              | capillary wall                                    |     |     |     |     |    |   |       |        |
|           |              | continuous regular capillary wall (subepithelial) |     |     |     |     |    |   |       |        |
|           |              | capillary wall regular discontinuous              |     |     |     |     |    |   |       |        |
|           |              | irregular capillary wall (subendothelial)         |     |     |     |     |    |   |       |        |
|           |              | INTENSITY                                         |     |     |     |     |    |   |       |        |

The immunofluorescence report adopted at our center describes the *'Appearance'*, *'Distribution'* and *'Location'* of immune deposits. Furthermore, the *'Intensity'* of staining is described by a semi-quantitative rank with discrete values from 0 to 3 (by 0.5 intervals). The report includes the evaluation of IgG, IgA, IgM immunoglobulins, complement fractions C1Q, C3, Fibrinogen, Kappa and Lambda light chains.

**Supplemental Table 2. Final diagnoses of the kidney biopsies.**

| <b>Diagnosis</b>                                                   | <b>Freq</b> | <b>Percent</b> |
|--------------------------------------------------------------------|-------------|----------------|
| IgA Nephropathy                                                    | 401         | 16%            |
| Membranous Glomerulonephritis                                      | 232         | 9%             |
| Mesangial Proliferative Glomerulonephritis without immune deposits | 150         | 6%             |
| Diabetic Nephropathy                                               | 146         | 6%             |
| Mesangial Proliferative Glomerulonephritis with IgM Deposits       | 134         | 5%             |
| Chronic Interstitial Nephritis                                     | 111         | 4%             |
| Unclassified Nephropathy                                           | 98          | 4%             |
| Membranoproliferative Glomerulonephritis                           | 78          | 3%             |
| Benign Nephroangiosclerosis                                        | 65          | 3%             |
| Lupus Nephritis                                                    | 64          | 3%             |
| Other Diagnoses                                                    | 1063        | 41%            |
| <b>Total</b>                                                       | <b>2225</b> | <b>100%</b>    |

**Supplemental Table 3. Numeric distribution of the immunofluorescence features.**

|                  |                     |                                                   | <b>IgG</b> | <b>IgA</b> | <b>IgM</b> | <b>C1q</b> | <b>C3</b> | <b>F</b> | <b>Kappa</b> | <b>Lambda</b> | <b>Overall</b> |
|------------------|---------------------|---------------------------------------------------|------------|------------|------------|------------|-----------|----------|--------------|---------------|----------------|
| <b>GLOMERULI</b> | <b>appearance</b>   | linear                                            | 28         | 11         | 4          | 1          | 6         | 10       | 9            | 19            | <b>88</b>      |
|                  |                     | pseudolinear                                      | 139        | 75         | 18         | 2          | 14        | 22       | 45           | 20            | <b>335</b>     |
|                  |                     | coarse granular                                   | 55         | 78         | 277        | 87         | 260       | 28       | 74           | 127           | <b>986</b>     |
|                  |                     | fine granular                                     | 171        | 126        | 109        | 43         | 182       | 41       | 135          | 165           | <b>972</b>     |
|                  | <b>distribution</b> | diffuse/segmental                                 | 50         | 91         | 265        | 67         | 138       | 52       | 57           | 96            | <b>816</b>     |
|                  |                     | diffuse/global                                    | 565        | 734        | 656        | 279        | 987       | 370      | 618          | 937           | <b>5146</b>    |
|                  |                     | focal/segmental                                   | 32         | 61         | 209        | 59         | 134       | 71       | 37           | 51            | <b>654</b>     |
|                  |                     | focal/global                                      | 15         | 22         | 59         | 14         | 43        | 11       | 9            | 23            | <b>196</b>     |
|                  | <b>location</b>     | mesangial                                         | 154        | 682        | 556        | 183        | 661       | 186      | 292          | 613           | <b>3327</b>    |
|                  |                     | capillary wall                                    | 158        | 301        | 318        | 95         | 305       | 264      | 158          | 300           | <b>1899</b>    |
|                  |                     | continuous regular capillary wall (subepithelial) | 365        | 135        | 116        | 87         | 295       | 67       | 291          | 341           | <b>1697</b>    |
|                  |                     | discontinuous regular capillary wall              | 17         | 17         | 35         | 14         | 97        | 13       | 14           | 25            | <b>232</b>     |
|                  |                     | irregular capillary wall (subendothelial)         | 93         | 135        | 514        | 183        | 378       | 83       | 131          | 207           | <b>1724</b>    |

**Supplemental Table 4. Percent distribution of the immunofluorescence features.**

|                  |                     |                                                   | <b>IgG</b> | <b>IgA</b> | <b>IgM</b> | <b>C1q</b> | <b>C3</b> | <b>F</b> | <b>Kappa</b> | <b>Lambda</b> |
|------------------|---------------------|---------------------------------------------------|------------|------------|------------|------------|-----------|----------|--------------|---------------|
| <b>GLOMERULI</b> | <b>appearance</b>   | linear                                            | 0.96%      | 0.38%      | 0.14%      | 0.03%      | 0.20%     | 0.34%    | 0.31%        | 0.65%         |
|                  |                     | pseudolinear                                      | 5%         | 3%         | 0.61%      | 0.07%      | 0.48%     | 0.75%    | 1%           | 0.68%         |
|                  |                     | coarse granular                                   | 2%         | 3%         | 9%         | 3%         | 9%        | 0.96%    | 3%           | 4%            |
|                  |                     | fine granular                                     | 6%         | 4%         | 4%         | 1%         | 6%        | 1%       | 5%           | 6%            |
|                  | <b>distribution</b> | diffuse/segmental                                 | 2%         | 3%         | 9%         | 2%         | 5%        | 2%       | 2%           | 3%            |
|                  |                     | diffuse/global                                    | 19%        | 25%        | 22%        | 10%        | 34%       | 13%      | 21%          | 33%           |
|                  |                     | focal/segmental                                   | 1%         | 2%         | 7%         | 2%         | 5%        | 2%       | 1%           | 2%            |
|                  |                     | focal/global                                      | 1%         | 1%         | 2%         | 0.48%      | 1%        | 0.38%    | 0.31%        | 0.78%         |
|                  | <b>location</b>     | mesangial                                         | 5%         | 23%        | 19%        | 6%         | 23%       | 6%       | 10%          | 21%           |
|                  |                     | capillary wall                                    | 5%         | 10%        | 11%        | 3%         | 10%       | 9%       | 5%           | 10%           |
|                  |                     | continuous regular capillary wall (subepithelial) | 12%        | 5%         | 4%         | 3%         | 10%       | 2%       | 10%          | 12%           |
|                  |                     | discontinuous regular capillary wall              | 0.58%      | 0.58%      | 1%         | 0.48%      | 3%        | 0.44%    | 0.48%        | 0.85%         |
|                  |                     | irregular capillary wall (subendothelial)         | 3%         | 5%         | 18%        | 6%         | 13%       | 3%       | 4%           | 7%            |

**Supplemental Table 5. Ground truth agreement between pathologists and Convolutional Neural Network.**

Agreement between human evaluators (three different pathologists) and Convolutional Neural Networks was calculated by the Cohen's Kappa (Kappa  $\pm$  standard deviation of 20 test images per feature).

|              | Feature                              | Pathologist 1<br>vs<br>Ground Truth | Pathologist 2<br>vs<br>Ground Truth | Pathologist 3<br>vs<br>Ground Truth | CNN<br>vs<br>Ground Truth |
|--------------|--------------------------------------|-------------------------------------|-------------------------------------|-------------------------------------|---------------------------|
| Appearance   | coarse granular                      | 0.40 $\pm$ 0.20                     | 0.50 $\pm$ 0.21                     | 0.60 $\pm$ 0.20                     | 0.40 $\pm$ 0.24           |
|              | fine granular                        | 0.30 $\pm$ 0.16                     | 0.30 $\pm$ 0.22                     | 0.20 $\pm$ 0.22                     | 0.30 $\pm$ 0.25           |
| Distribution | segmental                            | 0.41 $\pm$ 0.20                     | 0.50 $\pm$ 0.21                     | 0.10 $\pm$ 0.22                     | 0.20 $\pm$ 0.25           |
|              | global                               | 0.67 $\pm$ 0.21                     | 0.40 $\pm$ 0.18                     | 0.60 $\pm$ 0.22                     | 0.60 $\pm$ 0.21           |
| Location     | mesangial                            | 0.80 $\pm$ 0.22                     | 0.50 $\pm$ 0.21                     | 0.50 $\pm$ 0.21                     | 0.90 $\pm$ 0.11           |
|              | capillary wall                       | 0.60 $\pm$ 0.22                     | 0.40 $\pm$ 0.22                     | 0.40 $\pm$ 0.22                     | 0.50 $\pm$ 0.22           |
|              | continuous regular<br>capillary wall | 0.60 $\pm$ 0.20                     | 0.40 $\pm$ 0.18                     | 0.50 $\pm$ 0.22                     | 0.60 $\pm$ 0.21           |
|              | irregular capillary wall             | 0.30 $\pm$ 0.22                     | 0.40 $\pm$ 0.20                     | 0.20 $\pm$ 0.20                     | 0.40 $\pm$ 0.24           |

**Supplemental Table 6. Inter-agreement Cohen's K of each feature.**

Pathologist 1, 2, 3 (Pat.1, Pat. 2, Pat. 3); Ground Truth (GT); Convolutional Neural Network (CNNs).

| <b>Mesangial</b>                         | GT          | CNNs        | Pat.1       | Pat.2       |
|------------------------------------------|-------------|-------------|-------------|-------------|
| Pat.3                                    | 0.50 ± 0.22 | 0.59 ± 0.21 | 0.70 ± 0.18 | 0.34 ± 0.26 |
| Pat.2                                    | 0.50 ± 0.22 | 0.59 ± 0.21 | 0.50 ± 0.22 |             |
| Pat.1                                    | 0.80 ± 0.15 | 0.70 ± 0.18 |             |             |
| CNNs                                     | 0.90 ± 0.11 |             |             |             |
| <b>Capillary wall</b>                    | GT          | CNNs        | Pat.1       | Pat.2       |
| Pat.3                                    | 0.40 ± 0.24 | 0.70 ± 0.18 | 0.60 ± 0.21 | 0.60 ± 0.21 |
| Pat.2                                    | 0.40 ± 0.24 | 0.90 ± 0.11 | 0.42 ± 0.23 |             |
| Pat.1                                    | 0.60 ± 0.21 | 0.51 ± 0.22 |             |             |
| CNNs                                     | 0.50 ± 0.22 |             |             |             |
| <b>Continuous Regular Capillary wall</b> | GT          | CNNs        | Pat.1       | Pat.2       |
| Pat.3                                    | 0.50 ± 0.22 | 0.31 ± 0.24 | 0.52 ± 0.21 | 0.34 ± 0.23 |
| Pat.2                                    | 0.40 ± 0.24 | 0.32 ± 0.27 | 0.74 ± 0.20 |             |
| Pat.1                                    | 0.60 ± 0.21 | 0.57 ± 0.22 |             |             |
| CNNs                                     | 0.60 ± 0.21 |             |             |             |
| <b>Irregular Capillary wall</b>          | GT          | CNNs        | Pat.1       | Pat.2       |
| Pat.3                                    | 0.20 ± 0.25 | 0.40 ± 0.24 | 0.48 ± 0.23 | 0.52 ± 0.24 |
| Pat.2                                    | 0.40 ± 0.24 | 0.40 ± 0.24 | 0.48 ± 0.23 |             |
| Pat.1                                    | 0.30 ± 0.25 | 0.30 ± 0.25 |             |             |
| CNNs                                     | 0.40 ± 0.24 |             |             |             |
| <b>Coarse Granular</b>                   | GT          | CNNs        | Pat.1       | Pat.2       |
| Pat.3                                    | 0.60 ± 0.21 | 0.76 ± 0.18 | 0.76 ± 0.18 | 0.66 ± 0.21 |
| Pat.2                                    | 0.50 ± 0.22 | 0.89 ± 0.13 | 0.66 ± 0.21 |             |
| Pat.1                                    | 0.40 ± 0.24 | 0.76 ± 0.18 |             |             |
| CNNs                                     | 0.40 ± 0.24 |             |             |             |
| <b>Fine Granular</b>                     | GT          | CNNs        | Pat.1       | Pat.2       |
| Pat.3                                    | 0.20 ± 0.25 | 0.30 ± 0.25 | 0.30 ± 0.25 | 0.70 ± 0.18 |
| Pat.2                                    | 0.30 ± 0.25 | 0.35 ± 0.25 | 0.35 ± 0.25 |             |
| Pat.1                                    | 0.10 ± 0.26 | 0.61 ± 0.30 |             |             |
| CNNs                                     | 0.30 ± 0.25 |             |             |             |
| <b>Segmental</b>                         | GT          | CNNs        | Pat.1       | Pat.2       |
| Pat.3                                    | 0.10 ± 0.26 | 0.06 ± 0.27 | 0.42 ± 0.23 | 0.18 ± 0.26 |

|       |                 |                 |                 |
|-------|-----------------|-----------------|-----------------|
| Pat.2 | $0.50 \pm 0.22$ | $0.43 \pm 0.25$ | $0.45 \pm 0.22$ |
| Pat.1 | $0.30 \pm 0.25$ | $0.38 \pm 0.22$ |                 |
| CNNs  | $0.20 \pm 0.25$ |                 |                 |

| <b>Global</b> | GT              | CNNs            | Pat.1           | Pat.2           |
|---------------|-----------------|-----------------|-----------------|-----------------|
| Pat.3         | $0.60 \pm 0.21$ | $0.35 \pm 0.26$ | $0.67 \pm 0.20$ | $0.55 \pm 0.23$ |
| Pat.2         | $0.40 \pm 0.24$ | $0.47 \pm 0.27$ | $0.86 \pm 0.16$ |                 |
| Pat.1         | $0.50 \pm 0.22$ | $0.38 \pm 0.28$ |                 |                 |
| CNNs          | $0.60 \pm 0.21$ |                 |                 |                 |



**Supplemental Table 7. Comparison of the report of a case of Lupus Nephritis (Supplemental Figure 4) between Ground Truth and Convolutional Neural Network (CNN).**

|           |              |                                                   | IgG Ground Truth                          | IgG CNN |  |
|-----------|--------------|---------------------------------------------------|-------------------------------------------|---------|--|
| GLOMERULI | appearance   | linear                                            |                                           |         |  |
|           |              | pseudolinear                                      |                                           |         |  |
|           |              | coarse granular                                   |                                           |         |  |
|           |              | fine granular                                     | yes                                       |         |  |
|           | distribution | segmental                                         |                                           |         |  |
|           |              | global                                            | yes                                       | yes     |  |
|           | location     | mesangial                                         |                                           |         |  |
|           |              | capillary wall                                    |                                           |         |  |
|           |              | continuous regular capillary wall (subepithelial) | yes                                       | yes     |  |
|           |              | discontinuous regular capillary wall              |                                           |         |  |
|           |              |                                                   | irregular capillary wall (subendothelial) |         |  |
|           |              | Intensity                                         | 3                                         | 3       |  |

The Convolutional Neural Network could correctly recognize the deposits of the tuft (except for the fine granular appearance) despite of the presence of the extraglomerular deposits.

**Supplemental Table 8. Ground truth agreement between pathologists and Convolutional Neural Networks.**

|           |              |                                                   | Lambda Light Chain Ground Truth           | Lambda Light Chain CNN |  |
|-----------|--------------|---------------------------------------------------|-------------------------------------------|------------------------|--|
| GLOMERULI | appearance   | linear                                            | yes                                       |                        |  |
|           |              | pseudolinear                                      |                                           |                        |  |
|           |              | coarse granular                                   |                                           |                        |  |
|           |              | fine granular                                     |                                           |                        |  |
|           | distribution | segmental                                         |                                           |                        |  |
|           |              | global                                            | yes                                       | yes                    |  |
|           | location     | mesangial                                         |                                           |                        |  |
|           |              | capillary wall                                    | yes                                       | yes                    |  |
|           |              | continuous regular capillary wall (subepithelial) |                                           |                        |  |
|           |              | discontinuous regular capillary wall              |                                           |                        |  |
|           |              |                                                   | irregular capillary wall (subendothelial) |                        |  |
|           |              | Intensity                                         | 3                                         | 3                      |  |

The Convolutional Neural Network (CNN) could correctly recognize the deposits of the tuft despite of the presence of the extraglomerular deposits. The Convolutional Neural Network could not recognize the linear appearance because it was not trained for this task.

**Supplemental Figure 1. Classification of the 'Appearance' of the deposits of the Immunofluorescence specimen <sup>1-3</sup>.**

| <b>APPEARANCE</b>                                                                                                                                                                                                                                                                                                                                                                                                                                                                                                                                                                                                                                  |                                                                                      |                                                                                       |
|----------------------------------------------------------------------------------------------------------------------------------------------------------------------------------------------------------------------------------------------------------------------------------------------------------------------------------------------------------------------------------------------------------------------------------------------------------------------------------------------------------------------------------------------------------------------------------------------------------------------------------------------------|--------------------------------------------------------------------------------------|---------------------------------------------------------------------------------------|
| <b>LINEAR and PSEUDO-LINEAR</b>                                                                                                                                                                                                                                                                                                                                                                                                                                                                                                                                                                                                                    | Scheme                                                                               | Example                                                                               |
| <p>The presence of the linear pattern is characteristic of the deposition of antibody against components of the glomerular basement membrane (GBM). The presence of circulant IgG against GBM is typical of the Goodpasture's syndrome <sup>4</sup>. Linear staining is also reported in diabetic nephropathy (pseudolinear) along the glomerular capillary walls with immunoglobulin G (IgG). In membranous glomerulonephritis the deposits are usually discrete and uniform, but in some cases, especially at the initial stage of the disease, they are small and confluent. In these instances, they could have a pseudolinear appearance.</p> |    |    |
| <b>COARSE GRANULAR</b>                                                                                                                                                                                                                                                                                                                                                                                                                                                                                                                                                                                                                             | Scheme                                                                               | Example                                                                               |
| <p>Coarse granularity can be identified in different conditions. For example, this pattern can be found in the deposits of membranoproliferative lesions and in the sub-epithelial deposits of postinfectious glomerulonephritis.</p>                                                                                                                                                                                                                                                                                                                                                                                                              |  |  |
| <b>FINE GRANULAR</b>                                                                                                                                                                                                                                                                                                                                                                                                                                                                                                                                                                                                                               | Scheme                                                                               | Example                                                                               |
| <p>Fine granularity as opposed to coarse granularity has smaller diameter deposits. This condition can, for example, be observed in the deposits of the membranous glomerulonephritis at the initial stages.</p>                                                                                                                                                                                                                                                                                                                                                                                                                                   |  |  |

**Supplemental Figure 2. Classification of the 'Distribution' of the deposits of the Immunofluorescence specimen <sup>1-3</sup>.**

| <b>DISTRIBUTION</b>                                                                                              |                                                                                                    |                                                                                                      |
|------------------------------------------------------------------------------------------------------------------|----------------------------------------------------------------------------------------------------|------------------------------------------------------------------------------------------------------|
| <p><b>DIFFUSE</b></p> <p>The term 'diffuse' describes a lesion that is involving more than 50% of glomeruli.</p> | <p>Scheme</p> 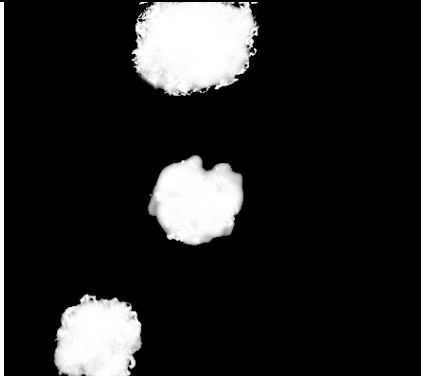   | <p>Example</p>    |
| <p><b>FOCAL</b></p> <p>Focal describes a lesion that is involving less than 50% of glomeruli.</p>                | <p>Scheme</p>   | <p>Example</p>   |
| <p><b>GLOBAL</b></p> <p>The term 'global' describes a lesion that involves all of a glomerular tuft.</p>         | <p>Scheme</p>  | <p>Example</p>  |
| <p><b>SEGMENTAL</b></p> <p>The term 'segmental' describes a lesion that involves part of a glomerular tuft.</p>  | <p>Scheme</p>  | <p>Example</p>  |

**Supplemental Figure 3. Classification of the 'Location' of the deposits of the Immunofluorescence specimen <sup>1-3</sup>.**

| <b>LOCATION</b>                                                                                                                                                                                                                                                                                                                          |                                                                                      |                                                                                       |
|------------------------------------------------------------------------------------------------------------------------------------------------------------------------------------------------------------------------------------------------------------------------------------------------------------------------------------------|--------------------------------------------------------------------------------------|---------------------------------------------------------------------------------------|
| <b>MESANGIAL</b>                                                                                                                                                                                                                                                                                                                         | Scheme                                                                               | Example                                                                               |
| <p>Mesangial deposition of immunoglobulin is the typical pattern of the IgA Nephropathy. However, mesangial deposition can be founded in other conditions such as membranoproliferative glomerulonephritis or postinfectious glomerulonephritis.</p>                                                                                     | 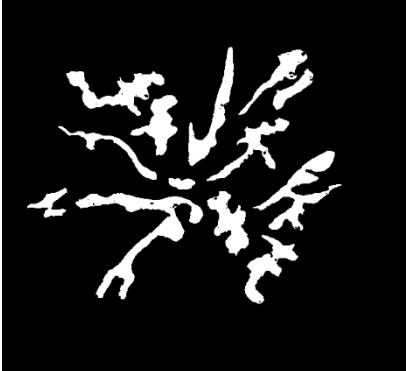   |    |
| <b>CONTINUOUS REGULAR CAPILLARY WALL</b>                                                                                                                                                                                                                                                                                                 | Scheme                                                                               | Example                                                                               |
| <p>The regular continuous capillary wall pattern corresponds to the identification of subepithelial deposits possible through ultramicroscopic analysis. This is the typical immunofluorescence finding of Membranous glomerulonephritis: a diffuse global granular deposits of immune reactants that follow the contour of the GBM.</p> |   |   |
| <b>DISCONTINUOUS REGULAR CAPILLARY WALL</b>                                                                                                                                                                                                                                                                                              | Scheme                                                                               | Example                                                                               |
| <p>This pattern is also described as "bumps and humps" or "lumpy-dumpy", traditionally associated with postinfectious glomerulonephritis.</p>                                                                                                                                                                                            |  |  |
| <b>IRREGULAR CAPILLARY WALL</b>                                                                                                                                                                                                                                                                                                          | Scheme                                                                               | Example                                                                               |
| <p>The irregular capillary wall pattern corresponds to the identification of subendothelial deposits, ribbon-like deposits, negative in the mesangium, giving the appearance of lobes. This pattern is frequently associated with membranoproliferative glomerulonephritis.</p>                                                          |  |  |

**Supplemental Figure 4. IgG direct Immunofluorescence of a Lupus Nephritis case (400X).** The image shows the presence of regular continuous capillary wall deposits of the glomerulus and basal membrane deposits of the tubules. The Convolutional Neural Network could correctly recognize the deposits of the tuft despite of the presence of the extraglomerular deposits (see Supplemental Table 7).

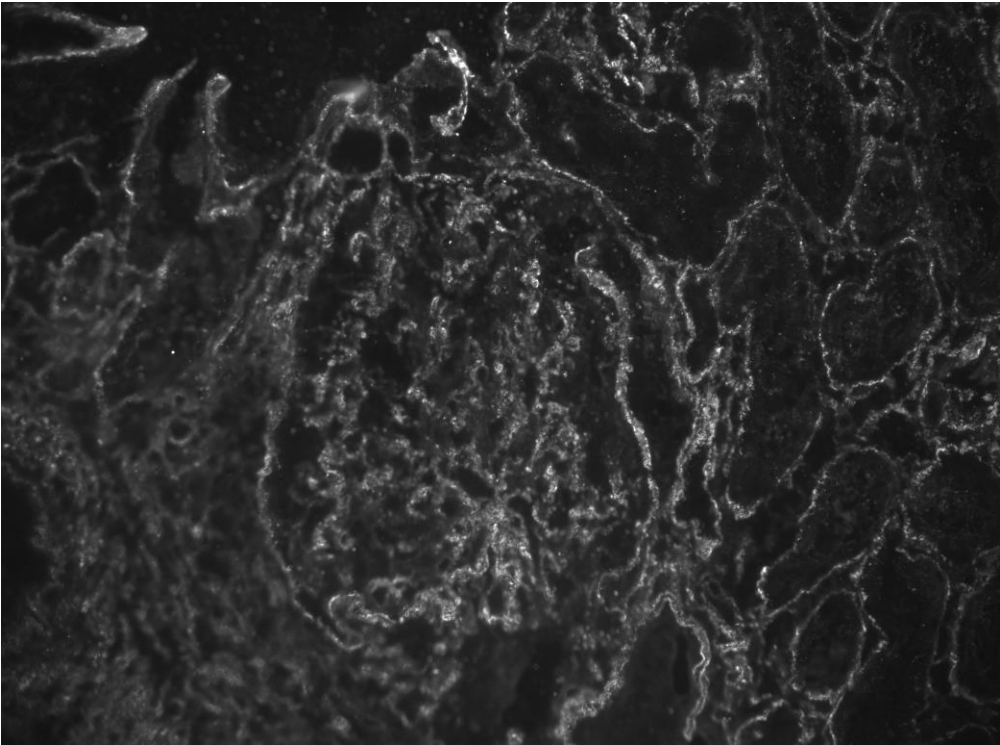

**Supplemental Figure 5. IgG direct Immunofluorescence of a Light Chain deposition disease (400X).** The image shows the presence of deposits of the capillary wall of the glomerulus and basal membrane deposits of the tubules. The Convolutional Neural Network could correctly recognize glomerular deposits despite of the presence of the extraglomerular deposits (see Supplemental Table 8).

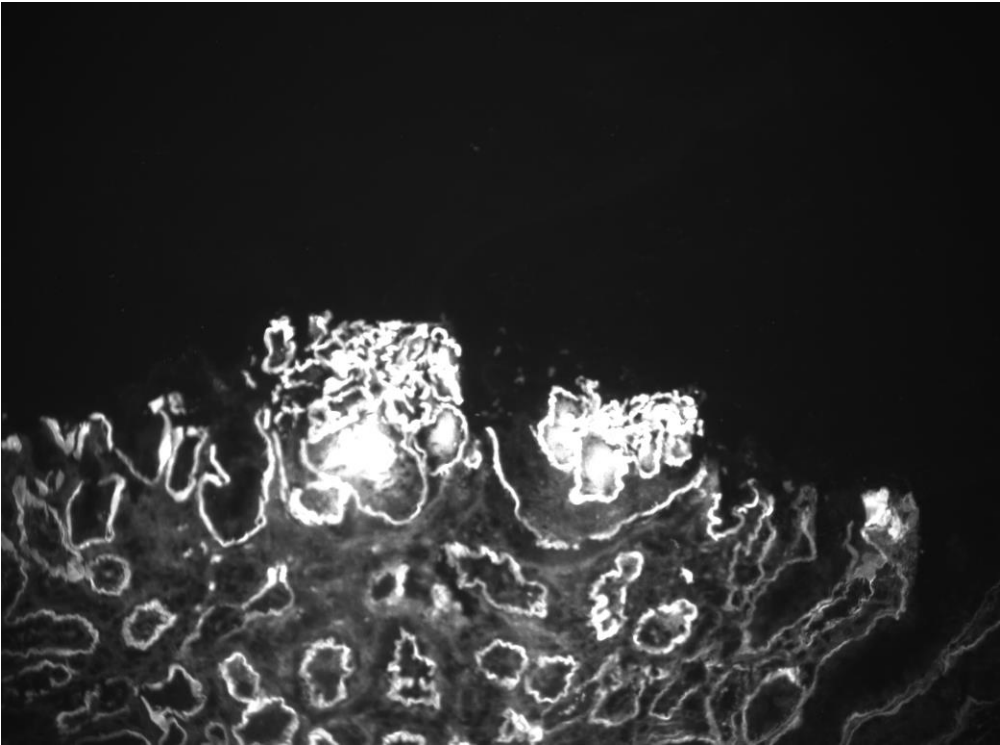

## References

1. Wilson, CB, Dixon, FJ: Diagnosis of immunopathologic renal disease. *Kidney International*, 5: 389-401, 1974.
2. Morel-Maroger, L, Leathem, A, Richet, G: Glomerular abnormalities in nonsystemic diseases. Relationship between findings by light microscopy and immunofluorescence in 433 renal biopsy specimens. *Am J Med*, 53: 170-184, 1972.
3. D'Amico, G, Colasanti, G, Bestetti-Bosisio, M: *Le Glomerulonefriti Primitive* La Medicina Internazionale, 1977.
4. Lerner, RA, Glassock, RJ, Dixon, FJ: The role of anti-glomerular basement membrane antibody in the pathogenesis of human glomerulonephritis. *J Exp Med*, 126: 989-1004, 1967.
